# Supplementary material for: The impact of dietary risk factors on the burden of non-communicable diseases in Ethiopia: findings from the Global Burden of Disease study 2013
Source: PubMed Central journal article supplement (PMC5159959; doi:10.1186/s12966-016-0447-x), 2016-12-16
Supplement: 12966_2016_447_MOESM1_ESM.pdf [file 12966_2016_447_MOESM1_ESM.pdf]

**Supplementary table 1: Dietary Risk factors, definitions, and Minimum theoretical risk exposure levels and data representative index (*Source: GBD 2013 Risk factors study*)**

| <b>Risk factors</b>                     | <b>Definition</b>                                                                                                                                                                                                                   | <b>Theoretical minimum risk exposure level</b>                                       | <b>DRI</b> |
|-----------------------------------------|-------------------------------------------------------------------------------------------------------------------------------------------------------------------------------------------------------------------------------------|--------------------------------------------------------------------------------------|------------|
| Diet low in fruits                      | Average daily consumption of fruits (fresh, frozen, cooked, canned, or dried, excluding fruit juices and salted or pickled fruits)                                                                                                  | Consumption of fruit between 200 g and 400 g per day                                 | 56.4%      |
| Diet low in vegetables                  | Average daily consumption of vegetables (fresh, frozen, cooked, canned, or dried vegetables, including legumes but excluding salted or pickled vegetables, juices, nuts and seeds, and starchy vegetables such as potatoes or corn) | Consumption of vegetables between 350 g and 450 g per day                            | 93.6%      |
| Diet low in whole grains                | Average daily consumption of whole grains (bran, germ, and endosperm in their natural proportion) from breakfast cereals, bread, rice, pasta, biscuits, muffins, tortillas, pancakes, and other sources                             | Consumption of whole grains between 100 g and 150 g per day                          | 89.9%      |
| Diet low in nuts and seeds              | Average daily consumption of nut and seed foods                                                                                                                                                                                     | Consumption of nuts and seeds between 12 g and 20 g per day                          | 86.7%      |
| Diet low in milk                        | Average daily consumption of milk, including non-fat, low fat, and full-fat milk, excluding soy milk and other plant derivatives                                                                                                    | Consumption of milk between 425 g and 475 g per day                                  | 91.0%      |
| Diet high in red meat                   | Average daily consumption of red meat (beef, pork, lamb, and goat but excluding poultry, fish, eggs, and all processed meats)                                                                                                       | Consumption of red meat between 11 · 4 g and 17 · 1 g per day                        | 91.0%      |
| Diet high in processed meat             | Average daily consumption of meat preserved by smoking, curing, salting, or addition of chemical preservatives                                                                                                                      | Consumption of processed meat between 0 g and 14 · 3 g per day                       | 28.2%      |
| Diet high in sugar sweetened beverages  | Average daily consumption of beverages with $\geq 50$ kcal per 226 · 8 g serving, including carbonated beverages, sodas, energy drinks, and fruit drinks, but excluding 100% fruit and vegetable juices                             | Consumption of sugar-sweetened beverages between 0 g and 64 · 3 g per day            | 27.1%      |
| Diet low in fibre                       | Average daily intake of fibre from all sources including fruits, vegetables, grains, legumes, and pulses                                                                                                                            | Consumption of fibre between 28 g and 32 g per day                                   | 27.1%      |
| Diet suboptimal in calcium              | Average daily intake of calcium from all sources, including milk, yogurt, and cheese                                                                                                                                                | Consumption of calcium between 0 g and 0 · 77 g per day                              | 31.4%      |
| Diet low in seafood omega-3 fatty acids | Average daily intake of eicosapentaenoic acid and docosahexaenoic acid                                                                                                                                                              | Consumption of seafood omega-3 fatty acids between 200 mg and 300 mg per day         | 90.4%      |
| Diet low in polyunsaturated fatty acids | Average daily intake of omega-6 fatty acids from all sources, mainly liquid vegetable oils, including soybean oil, corn oil, and safflower oil                                                                                      | Consumption of polyunsaturated fatty acids between 10% and 15% of total daily energy | 17.0%      |
| Diet high in trans fatty acids          | Average daily intake of trans fat from all sources, mainly partially hydrogenated vegetable oils and ruminant products                                                                                                              | Consumption of trans fatty acids between 0% and 0 · 8% of total daily energy         | 42.0%      |
| Diet high in sodium                     | 24 h urinary sodium measured in mg per day                                                                                                                                                                                          | Consumption of sodium between 1 g and 5 g per day                                    | 33.5%      |

**Data representativeness index (DRI):** The DRI for a risk factor is the fraction of countries for which we have identified any data for the risk factor between 1985 and 2013.

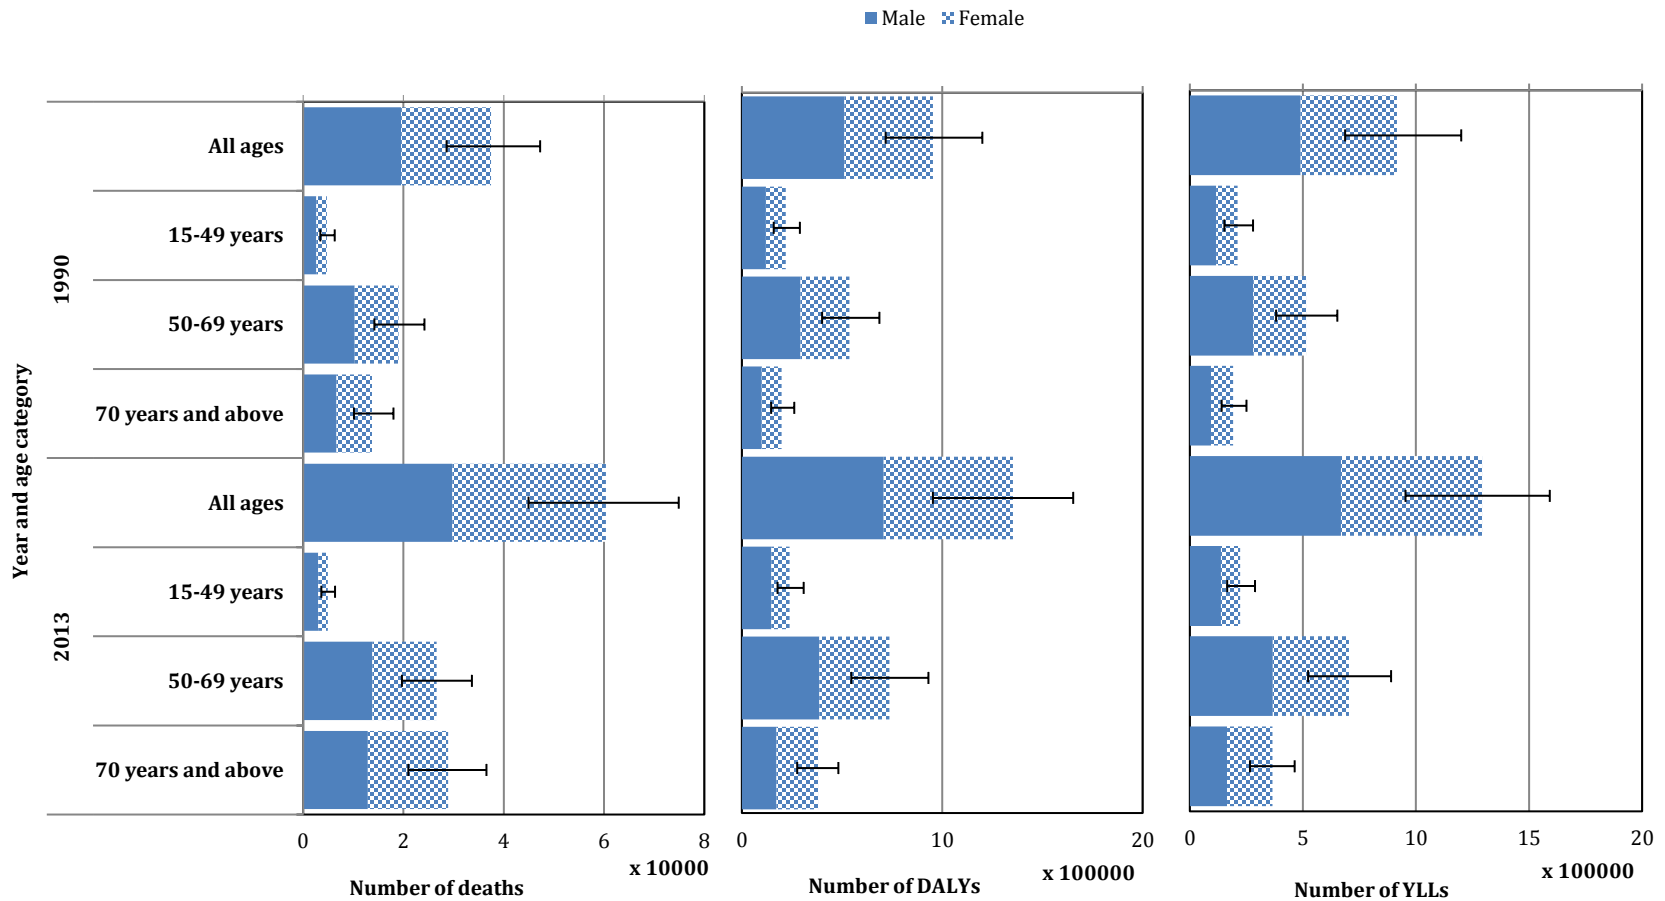

**Supplementary Figure 1:** Burden of disease (deaths, disability-adjusted life years (DALYs) and years of life lost YLLs) with 95% uncertainty interval related to dietary risks in Ethiopia for 1990 and 2013

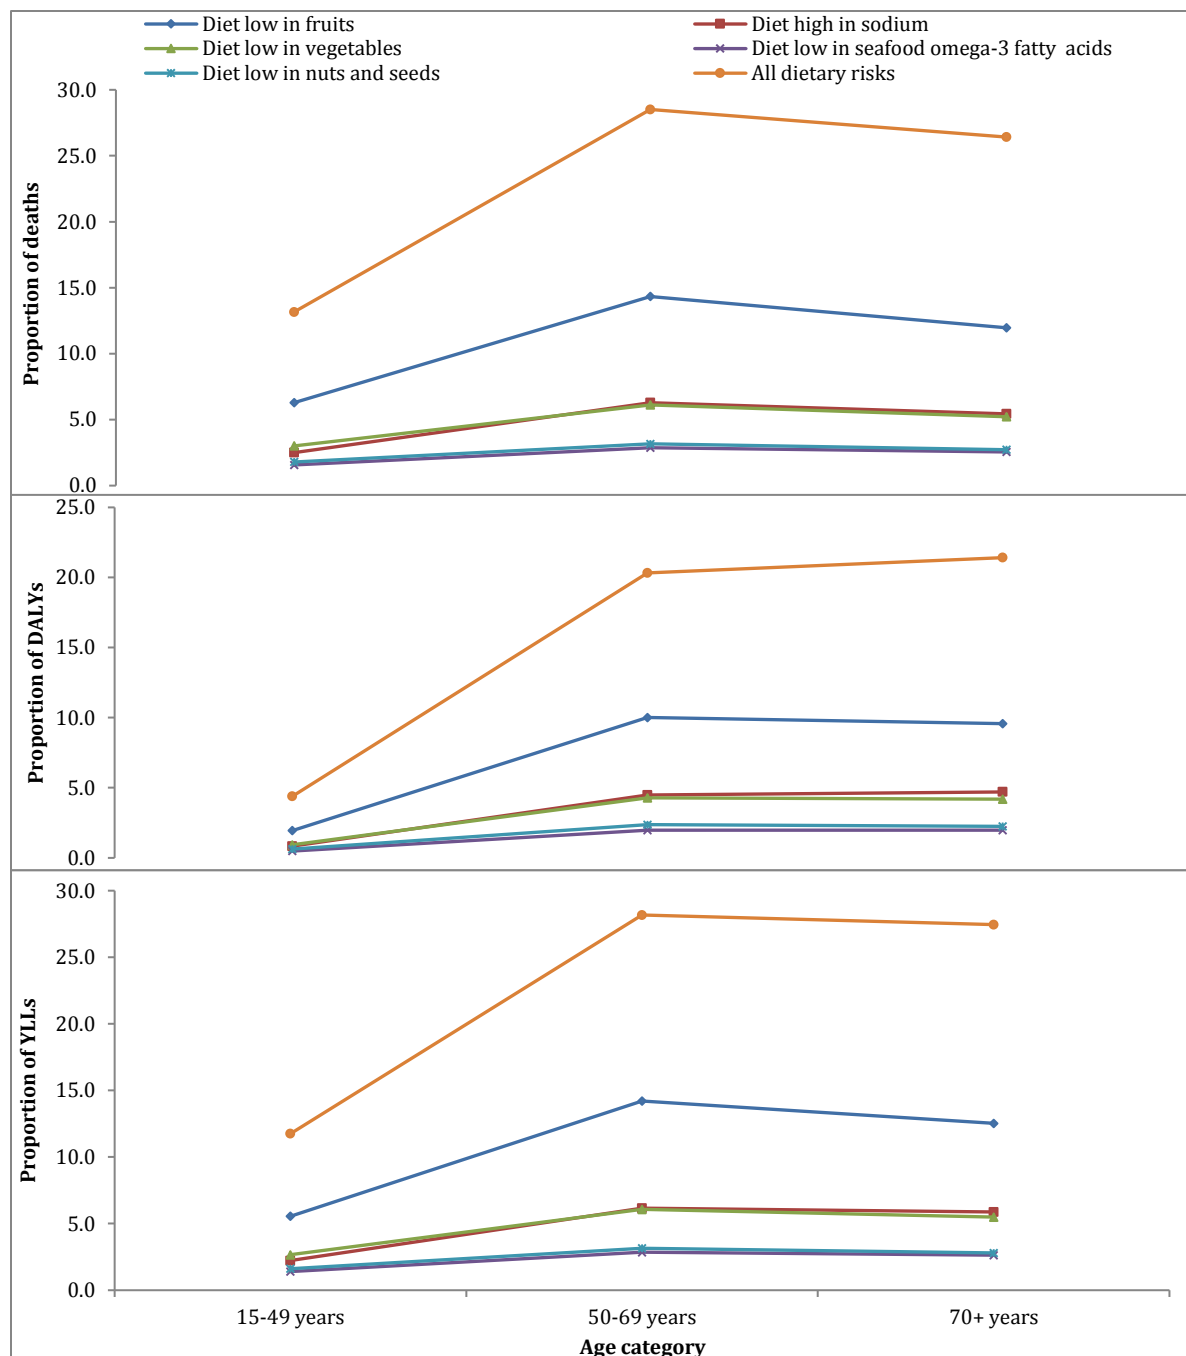

**Supplementary Figure 2:** The proportions of non-communicable diseases burden related to the top five dietary risks by age category in Ethiopia for 2013 (*The sum of percentages in rows exceeds the total for all dietary risk factors combined because of overlaps between various risk factors.*)

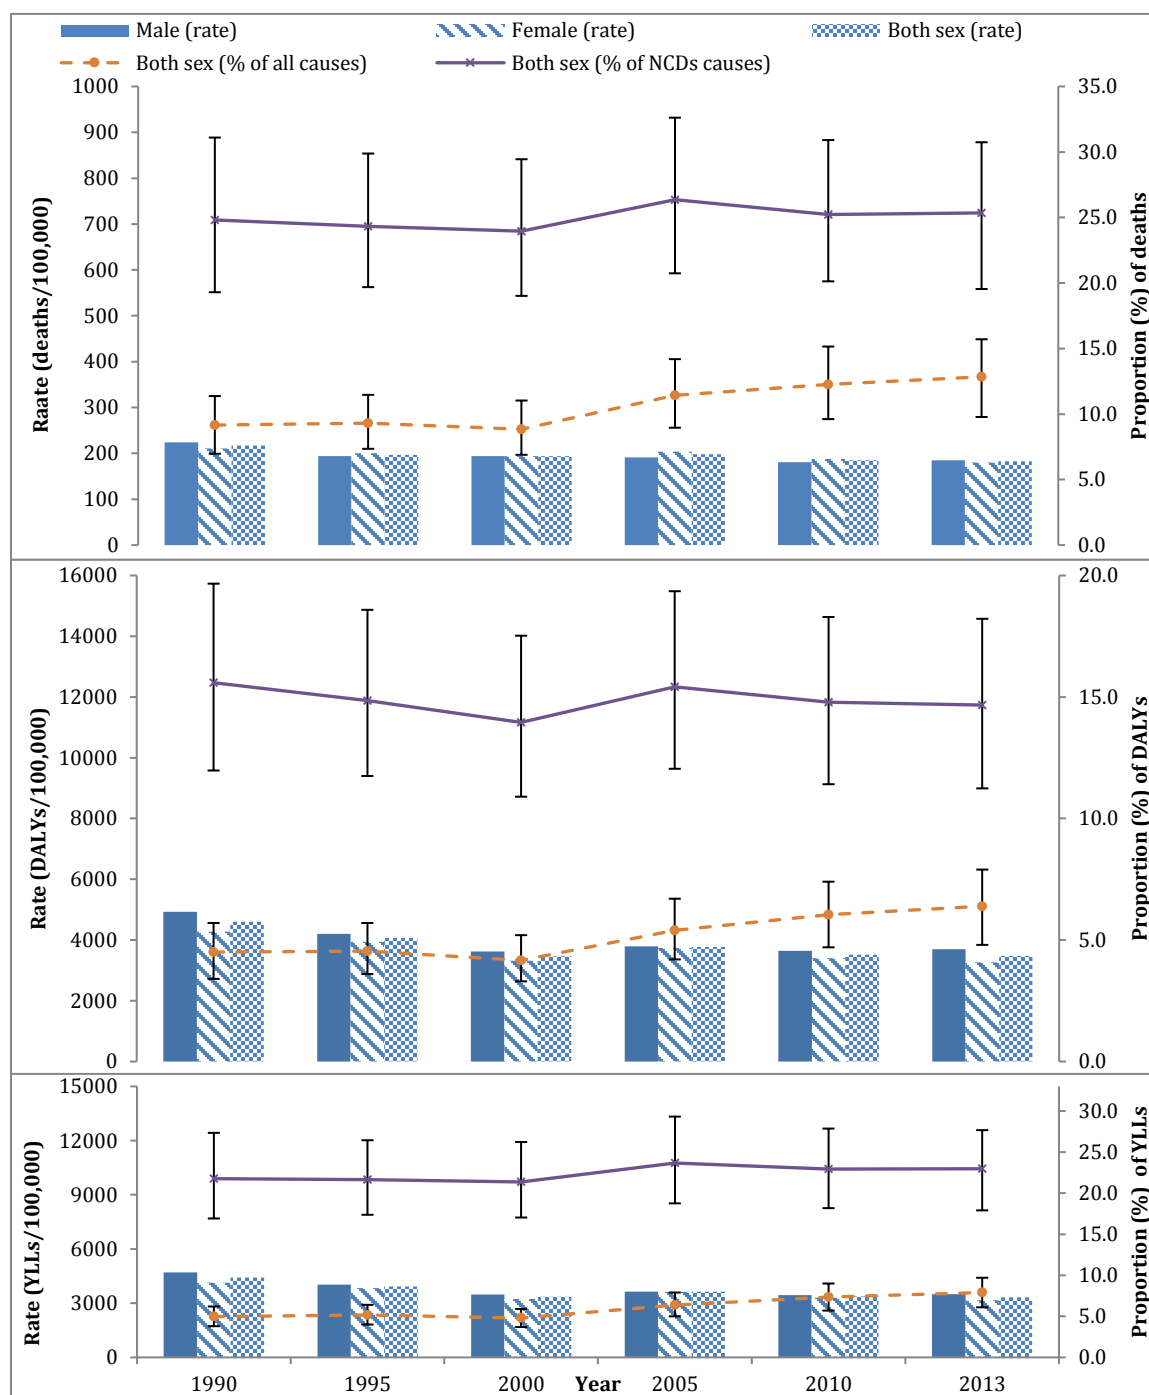

**Supplementary Figure 3:** Age-standardized diet-related burden of disease (deaths, disability-adjusted life years (DALYs) and year of life lost (YLLs)) with 95% uncertainty interval and the proportion of contribution to the burden of all cause and non-communicable diseases (NCDs) by sex between 1990 and 2013 in Ethiopia

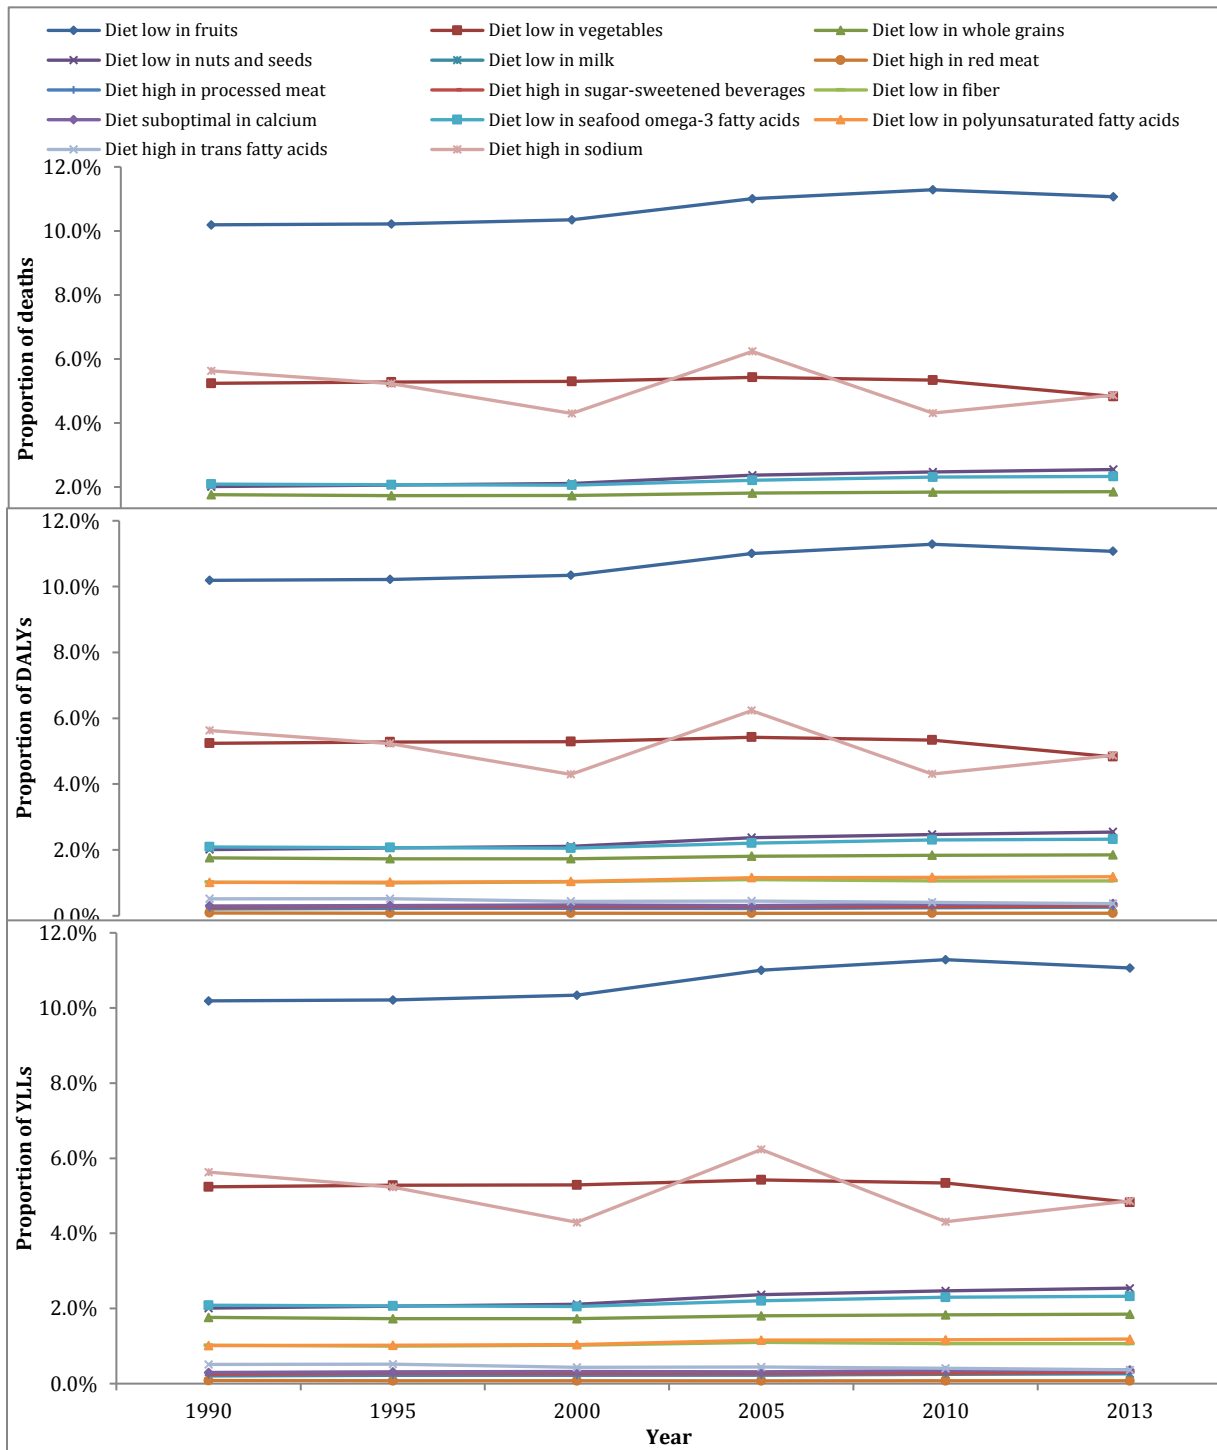

**Supplementary Figure 4:** Diet-related proportion of non-communicable diseases burden between 1990 and 2013 in Ethiopia (*The sum of percentages in rows exceeds the total for all dietary risk factors combined because of overlaps between various risk factors.*)
